# Supplementary material
Source: bioRxiv or medRxiv preprint supplement (https://medrxiv.org/highwire/filestream/79064/field_highwire_adjunct_files/0/2020.05.01.20079376-1.pdf)
Supplement: Supplementary file [file 2020.05.01.20079376-1.pdf]

Supplementary Table S1: exact P values by Mann-Whitney test and Chi-squared test

|                          | ALL COVID PATIENTS |                |                     |                     |                     | MALE             |                |                     |                     |                     | FEMALE           |                |                     |                     |                     |       |       |       |
|--------------------------|--------------------|----------------|---------------------|---------------------|---------------------|------------------|----------------|---------------------|---------------------|---------------------|------------------|----------------|---------------------|---------------------|---------------------|-------|-------|-------|
|                          | Diseased Control   | COVID-19 (all) | COVID-19 CT Stage 1 | COVID-19 CT Stage 2 | COVID-19 CT Stage 3 | Diseased Control | COVID-19 (all) | COVID-19 CT Stage 1 | COVID-19 CT Stage 2 | COVID-19 CT Stage 3 | Diseased Control | COVID-19 (all) | COVID-19 CT Stage 1 | COVID-19 CT Stage 2 | COVID-19 CT Stage 3 |       |       |       |
| Gender                   | n                  | 2717           | 186                 | 46                  | 55                  | 85               | n              | 999                 | 109                 | 29                  | 30               | 50             | n                   | 1718                | 77                  | 17    | 25    | 35    |
|                          | Male (%)           | 999            | 109                 | 29                  | 30                  | 50               | Male (%)       | 36.8                | 58.6                | 63.0                | 54.5             | 58.8           | Female (%)          | 1718                | 77                  | 17    | 25    | 35    |
| Age (y)                  | Female (%)         | 63.2           | 41.4                | 37.0                | 45.5                | 41.2             | Female (%)     | 63.2                | 41.4                | 37.0                | 45.5             | 41.2           | Female (%)          | 63.2                | 41.4                | 37.0  | 45.5  | 41.2  |
|                          | PS0                | 68             | 69                  | 74                  | 71                  | 63               | PS0            | 68                  | 69                  | 74                  | 71               | 63             | PS0                 | 68                  | 71                  | 68    | 72    | 66    |
| 25(OH)-Vitamin D (ng/ml) | IQR                | 49-82          | 52-80               | 53-82               | 60-78               | 50-80            | IQR            | 53-81               | 53-79               | 58-81               | 59-78            | 52-77          | IQR                 | 46-83               | 65-74               | 46-83 | 64-76 | 49-82 |
|                          | Min                | 18             | 18                  | 18                  | 39                  | 21               | Min            | 18                  | 21                  | 31                  | 40               | 21             | Min                 | 18                  | 18                  | 18    | 39    | 22    |
| ≥20 (n)                  | Max                | 103            | 94                  | 94                  | 89                  | 93               | Max            | 100                 | 93                  | 93                  | 89               | 88             | Max                 | 103                 | 94                  | 94    | 83    | 93    |
|                          | ≥20 (%)            | 45.2           | 58.6                | 52.2                | 58.2                | 62.4             | ≥20 (%)        | 49.2                | 67.0                | 55.2                | 66.7             | 74.0           | ≥20 (%)             | 42.8                | 46.8                | 47.1  | 48.0  | 45.7  |
| *OPTIMAL* ≥30 (n)        | <20 (n)            | 1227           | 109                 | 24                  | 32                  | 53               | <20 (n)        | 492                 | 73                  | 16                  | 20               | 37             | <20 (n)             | 735                 | 36                  | 8     | 12    | 16    |
|                          | <20 (%)            | 44.8           | 41.4                | 47.8                | 41.8                | 37.6             | <20 (%)        | 50.8                | 33.0                | 44.8                | 33.3             | 26.0           | <20 (%)             | 57.2                | 53.2                | 52.9  | 52.0  | 54.3  |
| *OPTIMAL* ≥30 (%)        | ≥30 (n)            | 729            | 33                  | 12                  | 10                  | 11               | ≥30 (n)        | 213                 | 15                  | 7                   | 4                | 4              | ≥30 (n)             | 516                 | 18                  | 5     | 6     | 7     |
|                          | ≥30 (%)            | 26.8           | 17.7                | 26.1                | 18.2                | 12.9             | ≥30 (%)        | 21.3                | 13.8                | 24.1                | 13.3             | 8.0            | ≥30 (%)             | 30.0                | 23.4                | 29.4  | 24.0  | 20.0  |
| *OPTIMAL* <30 (n)        | <30 (n)            | 1588           | 153                 | 34                  | 45                  | 74               | <30 (n)        | 786                 | 94                  | 22                  | 26               | 46             | <30 (n)             | 1202                | 59                  | 12    | 15    | 28    |
|                          | <30 (%)            | 58.2           | 41.4                | 52.2                | 51.8                | 62.4             | <30 (%)        | 78.7                | 86.2                | 75.9                | 86.7             | 92.0           | <30 (%)             | 70.0                | 76.6                | 70.6  | 76.0  | 80.0  |

statistical differences in median 25(OH)D levels across groups calculated by Mann-Whitney test. Proportions for categorical variables were compared using the chi-squared test

### **Supplementary methods: detailed CT scanning protocol**

All patients were imaged by MDCT using either of the following CT scanners: the GE LightSpeed VCT scanner (1-mm slice thickness), Siemens Somatom AS (1-mm slice thickness) or the GE Optmima 660 scanner (1.25-mm slice thickness). All scans were performed without intravenous contrast with the patient in the supine position during end-inspiration. Only the initial CTs were included; follow-up CTs during the study time window were not analyzed. *Image Viewing and Evaluation* Two cardiothoracic radiologists with 24 and 9 years of experience retrospectively reviewed the CT exams on a PACS workstation (IDS7, Sectra) with multiplanar reconstruction tools. Decision was reached by consensus. For each patient, the chest CT scan was evaluated for the following characteristics: (1) presence of ground-glass opacities (early stage, “**stage 1**”), (2) presence of crazy paving pattern (progressive stage, “**stage 2**”), (3) presence of consolidation (peak stage, “**stage 3**”), (4) number of lobes affected where either ground-glass / consolidative opacities were present, (5) degree of involvement of each lung lobe in addition to overall extent of lung involvement measured by means of a “CT-severity score” as detailed below, (6) presence of a pleural effusion, (7) presence of pericardial effusion, (8) presence of thoracic lymphadenopathy (defined as lymph node size of  $\geq 10$  mm in short-axis dimension), (10) airways abnormalities (including bronchiectasis, bronchial wall thickening and endoluminal secretions), (11) craniocaudal and anteroposterior distribution of disease (12) presence of underlying lung disease such as emphysema or fibrosis. Each of the five lung lobes was assessed for degree of involvement and classified as none (0%), discrete (<5%), minimal (5 - 25%), mild (26 - 50%), moderate (51 - 75%), or severe (> 75%). No involvement corresponded to a lobe score of 0, discrete to a lobe score of 1, minimal to a lobe score of 2, mild to a lobe score of 3, moderate to a lobe score of 4, and severe to a lobe score of 5. An overall lung “CT-severity score” was reached by summing the five lobe scores (range of possible scores, 0 - 25). CT-severity score was not used in the current study.

The stage was estimated by consensus evaluation of the predominant radiological presentation: ground-glass opacities (early stage, 0-4 days, “stage 1”), (2) presence of crazy paving pattern (progressive stage, 5-8 days, “stage 2”), (3) presence of consolidation (peak stage, 10-13 days, “stage 3”) <sup>1</sup>

### **Reference**

1. Bernheim A, Mei X, Huang M, et al. Chest CT Findings in Coronavirus Disease-19 (COVID-19): Relationship to Duration of Infection. *Radiology*. 2020:200463.
